# Supplementary material
Source: PubMed Central journal article supplement (PMC11029152)
Supplement: 262_2016_1932_MOESM1_ESM.pdf [file 262_2016_1932_MOESM1_ESM.pdf]

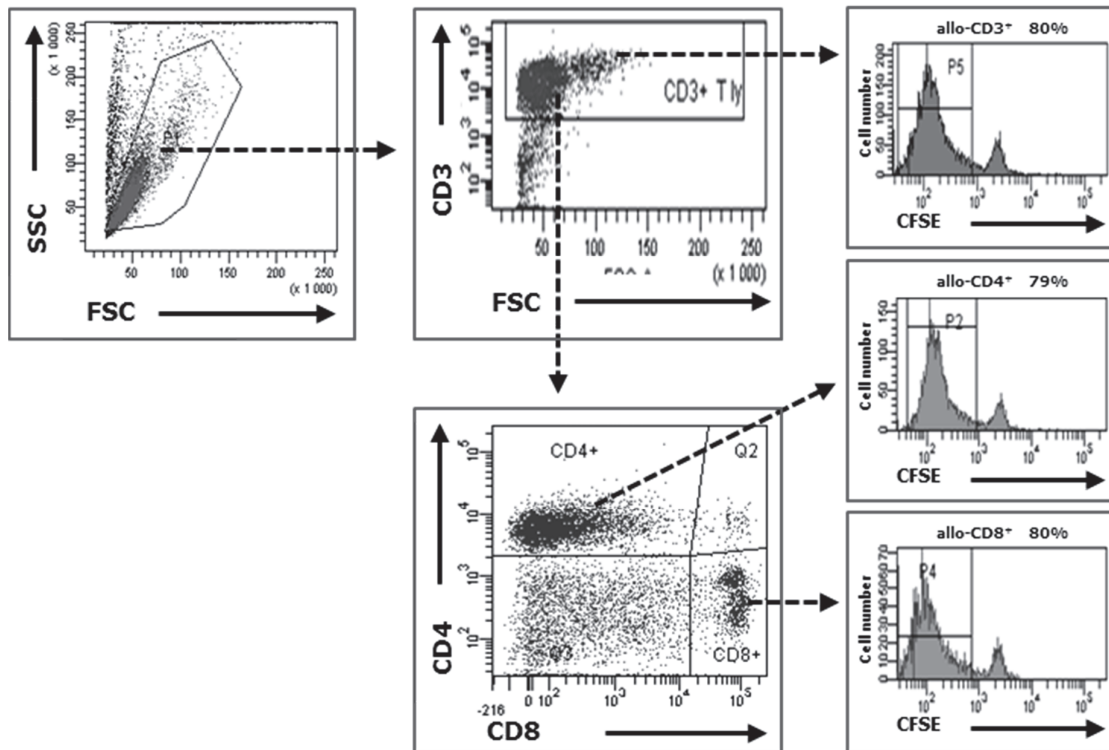

**Supplementary Figure 1. Gating strategy for multicolor flow cytometry analysis.**

Cells were first gated based on forward (size) and side (granularity) scatter characteristics. T cells were identified as mononuclear cells expressing CD3. CD3 positive (+) cells were either further subdivided based on expression of CD4 and CD8 into CD4<sup>+</sup> T cells and CD8<sup>+</sup> T cells, respectively, or directly analyzed for progressive CFSE dilution related to mitotic cell division. Subpopulations of CD4<sup>+</sup> T cells and CD8<sup>+</sup> T cells were further analyzed for progressive CFSE dilution related to mitotic cell division.

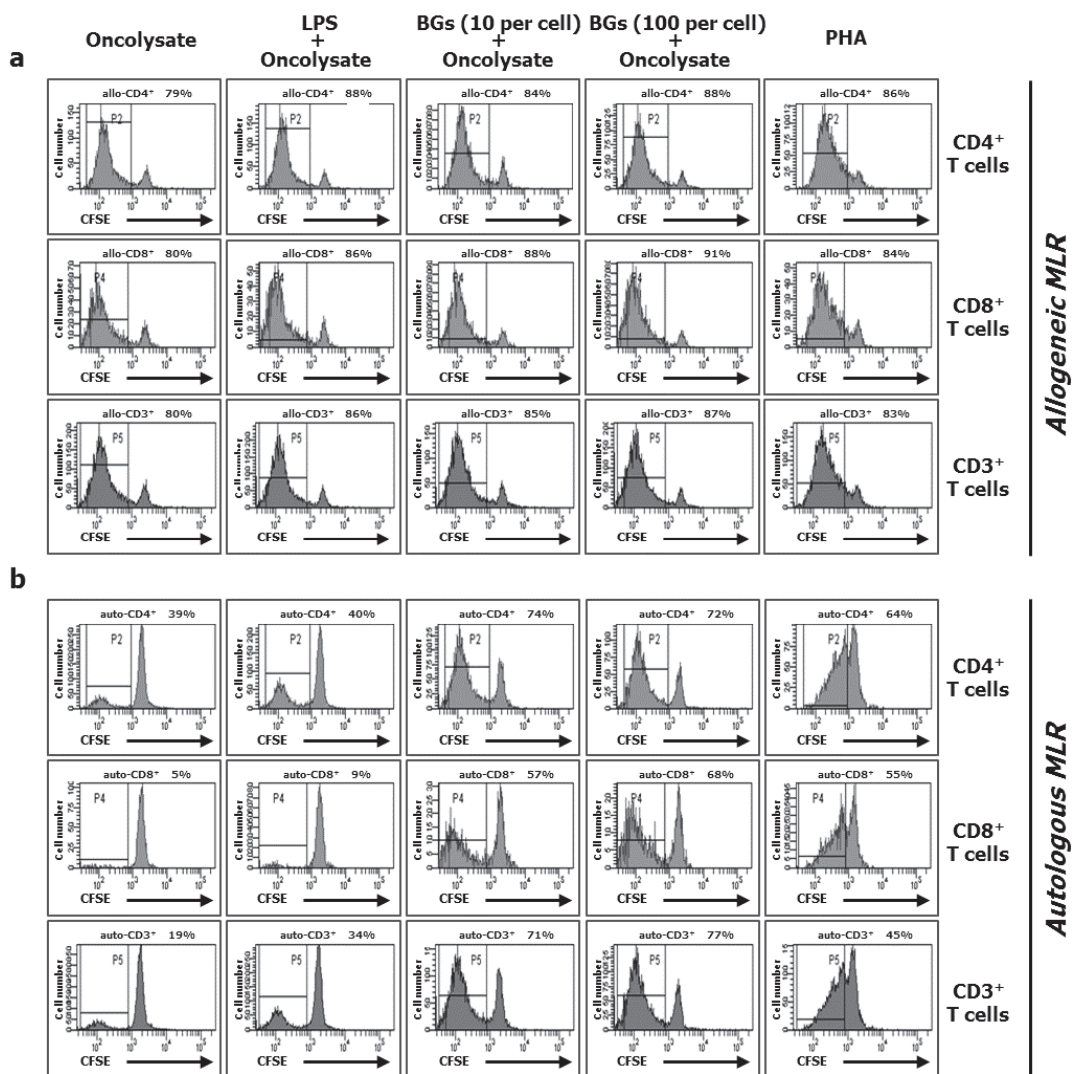

**Supplementary Figure 2. Representative histogram data set of the CFSE stained T cells used for determination of allogeneic and autologous immunostimulatory capacities of analyzed DCs.** Immunostimulatory properties of DC populations were determined after 6 days of incubation in the presence of CFSE-labeled allogeneic or autologous T cells at the ratio of DCs:T cells - 1:10 as described previously. **a** Allogeneic immunostimulatory capacities of analyzed DC populations. **b** Autologous immunostimulatory capacities of analyzed DC populations. T cells were first gated based on the strategy described in Supplementary Figure 1. The proliferation of responding T cells was assessed by progressive CFSE dilution related to mitotic cell division.

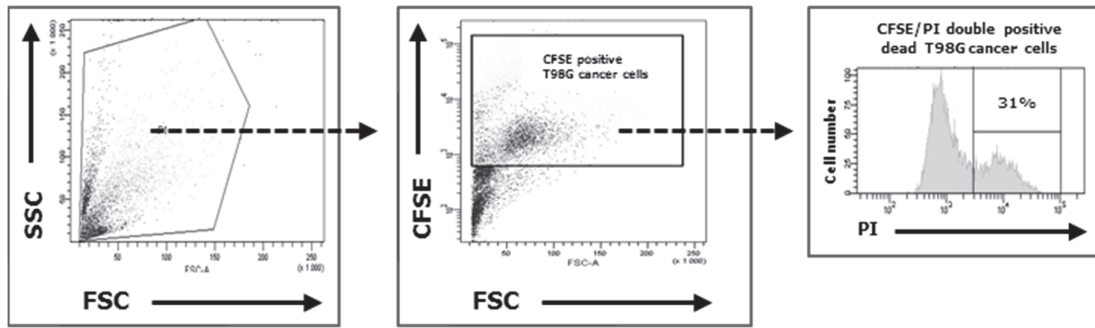

**Supplementary Figure 3. Gating strategy for the evaluation of target cell recognition and killing by stimulated T cells using a multicolor flow cytometry analysis.** Target cells (T98G cancer cells) were first identified as CFSE-positive cells followed by PI fluorescence determination indicating dead cells.

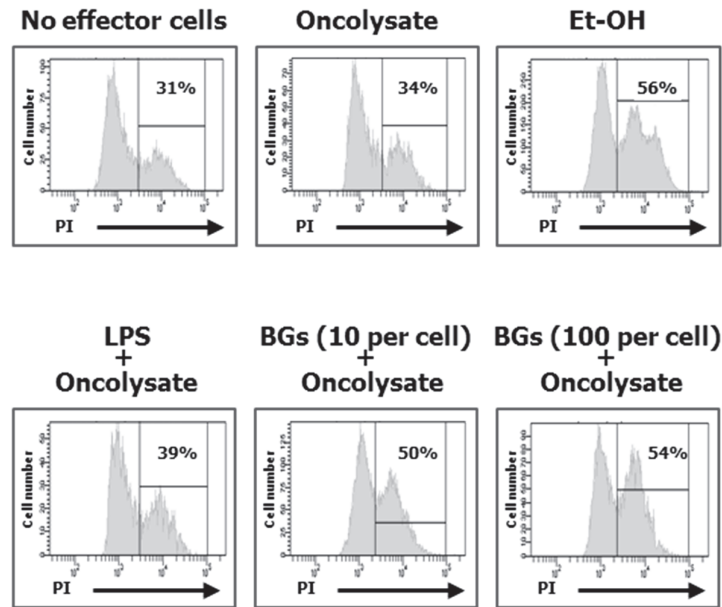

**Supplementary Figure 4. Representative histogram data set of the T98G cancer (target) cells counterstained with PI after incubation with stimulated autologous T cells.** The target cell recognition and killing efficacy of pre-sensitized oncolysate-derived antigen-specific T cells were determined after 24h of incubation with CFSE-labeled T98G cancer cells followed by counterstaining with PI as described previously. Target cells were first gated based on the strategy described in Supplementary Figure 3. Cancer cells recognized and killed by stimulated T cells are indicated as PI positive cells.
